# Supplementary material
Source: Research Square preprint supplement (doi:10.21203/rs.3.rs-8747626/v1)
Supplement: Supplementary file 1 [file 3833904fd32ee79ac45c4d17.docx]

**Supplementary Figure**

(A) Representative urinary albumin immunoblots shown as the indicated comparisons among Ctrl, LPS, GTS-21 + LPS, and GTS-21 groups.

(B) Densitometric quantification of urinary albumin in Ctrl vs GTS-21 (expressed relative to the Ctrl mean).

(C) Kidney RT–qPCR of the indicated markers in Ctrl vs GTS-21 groups (normalized to Gapdh and expressed relative to Ctrl).

(D) Representative urinary albumin immunoblots from α7WT and podocyte-specific α7KO mice under Ctrl, LPS, and GTS-21 + LPS conditions.

(E) Representative immunofluorescence images of synaptopodin in cultured podocytes under Ctrl vs GTS-21 conditions (DAPI counterstain).

(F) Quantification of synaptopodin fluorescence intensity from (E).

(G) RT–qPCR of Synpo in cultured podocytes under Ctrl vs GTS-21 conditions (normalized to Gapdh and expressed relative to Ctrl).

(H) Representative immunofluorescence images of ZO-1 in cultured podocytes under Ctrl vs GTS-21 conditions (DAPI counterstain).

(I) Quantification of ZO-1 fluorescence intensity from (H).

(J) RT–qPCR of Tjp1/ZO-1 in cultured podocytes under Ctrl vs GTS-21 conditions (normalized to Gapdh and expressed relative to Ctrl).

(K) Representative immunofluorescence images of NF-κB p65 localization (green) with DAPI (blue) at the indicated time points following LPS stimulation in podocytes pretreated with PNU-282987.

(L) Independent RT–qPCR replication of selected NF-κB–associated genes in cultured podocytes (normalized to Gapdh and expressed relative to Ctrl).

Data are presented as mean ± SD; each dot represents one biological replicate. Scale bars, 20 µm (E, H, K). Statistical tests are indicated in the graphs.

**Supplementary Tables**

**Primer list**

| **Gene** | **Forward (5′→3′)** | **Reverse (5′→3′)** |
| --- | --- | --- |
| m_Gapdh | AGGTCGGTGTGAACGGATTTG | TGTAGACCATGTAGTTGAGGTCA |
| m_Ccl2 | GACCTTAGGGCAGATGCAGT | AGCTGTAGTTTTTGTCACCAAGC |
| m_Podxl | GGAGTCTGGAGGAGATTGGC | GCGACACGTGTTTGAGCTTG |
| m_Nphs1 | TCATATCGCCAAGCCTTCACA | CCTCGTCATACAGGTGTCCG |
| m_Synpo | GGCTGCTGGAGCACTGG | TGAACTCGTTCACCCTCTGC |
| m_Nphs2 | TGCTACTACCGCATGGAAAATG | CTGCATCTAAGGCAACCTTTACA |
| m_Vcam1 | TGAACCCAAACAGAGGCAGAGT | GGTATCCCATCACTTGAGCAGG |
| m_Icam1 | CAATTTCTCATGCCGCACAG | AGCTGGAAGATCGAAAGTCCG |
| m_Il1b | CCTTCCAGGATGAGGACATGA | AACGTCACACACCAGCAGGTT |
| m_Acsf2 | AGCATTCGTGGAGGTGTGATT | ACTACCAGCCTTCTGCTCCA |
| m_Birc3 | GCCTAGCTGGGGACGATTTA | CTGCTAGGCTGATACCGCAG |
| m_Cxcl3 | ACCCAGACAGAAGTCATAGCCA | CTTCATCATGGTGAGGGGCT |
| m_Cxcl1 | ACCCAAACCGAAGTCATAGCC | TTGTCAGAAGCCAGCGTTCA |
| m_Cxcl5 | TCAGAAAATATTGGGCAGTGACA | CGTGGGTGGAGAGAATCAGC |
| m_Cxcl2 | CCAGACAGAAGTCATAGCCACT | GGTTCTTCCGTTGAGGGACA |
| m_Cxcl6 | AAGGTGGAAGTGGTAGCCTCC | TTTAGAAAAGGGGCTTCCGGG |
| m_Nfkbiz | CGTACTAGTCGCTCTGCCG | CGCCGTAGAAGTAAGCCAGG |

m_TJP1 GAAATACCTGACGGTGCTGC GAGGATGGCGTTACCCACAG

**Genotyping primer sequences**

Genotyping primers for NPHS2(Podocin)-Cre (JAX #008205) and Chrna7 floxed mice (JAX #026965).

| **Mouse line (JAX stock #)** | **Primer name** | **Sequence (5'→3')** |
| --- | --- | --- |
| Chrna7 floxed (026965) | Common (24714) | GTC CCT CTG CTG GTA TTT GC |
| Chrna7 floxed (026965) | Wild-type reverse (24715) | GAA CAA GTC AGA TAA GAA CCT |
| Chrna7 floxed (026965) | Mutant reverse (24716) | GCC CAA TTC CGA TCA TAT TC |
| NPHS2(Podocin)-Cre (008205) | Transgene reverse (14314) | CGG TTA TTC AAC TTG CAC CA |
| NPHS2(Podocin)-Cre (008205) | Transgene forward (29684) | GCG CTG CTG CTC CAG |
| NPHS2(Podocin)-Cre (008205) | Internal control forward (oIMR7338) | CTA GGC CAC AGA ATT GAA AGA TCT |
| NPHS2(Podocin)-Cre (008205) | Internal control reverse (oIMR7339) | GTA GGT GGA AAT TCT AGC ATC ATC C |
